# Supplementary material for: Effect assessment of NO&lt;sub&gt;x&lt;/sub&gt; and SO&lt;sub&gt;2&lt;/sub&gt; control policies on acid species in precipitation from 2005 to 2016 in China based on satellite monitoring
Source: Copernicus journal article supplement (doi:10.5194/acp-2017-770), 2017-09-28
Supplement: Supplementary file 1 [file acp-2017-770-supplement.pdf]

**Effect assessment of NO<sub>x</sub> and SO<sub>2</sub> control policies on acid components in precipitation from 2005**

**to 2016 in China, based on satellite monitoring**

Xiuying Zhang <sup>1,\*</sup>, Dongmei Chen <sup>2,3</sup>, Lei Liu <sup>1,4</sup>, Limin Zhao <sup>1</sup>, Wuting Zhang <sup>1</sup>

<sup>1</sup> International Institute for Earth System Science, Nanjing University, Nanjing 210023, China

<sup>2</sup> Department of Geography and Planning, Queen's University, Kingston, ONK7L 3N6, Canada

<sup>3</sup> School of Geography and Remote Sensing, Nanjing University of Information Science & Technology, Nanjing, China

<sup>4</sup> Jiangsu Center for Collaborative Innovation in Geographical Information Resource Development and Application, Nanjing 210023, China

\* Corresponding authors: Xiuying Zhang ([lzhxy77@163.com](mailto:lzhxy77@163.com))

---

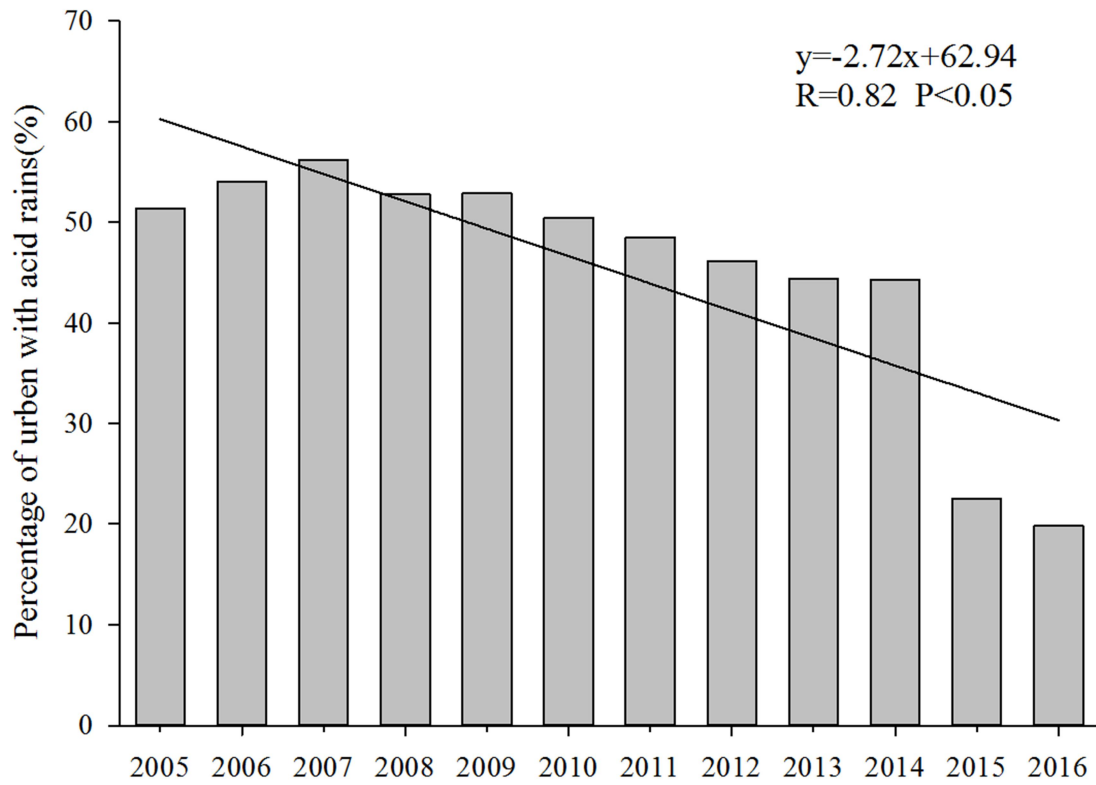

**Fig.S1** Trend of percentage of urban with acid rains (%) from 2005 to 2016 (China Environmental Bulletin 2005 – 2016)

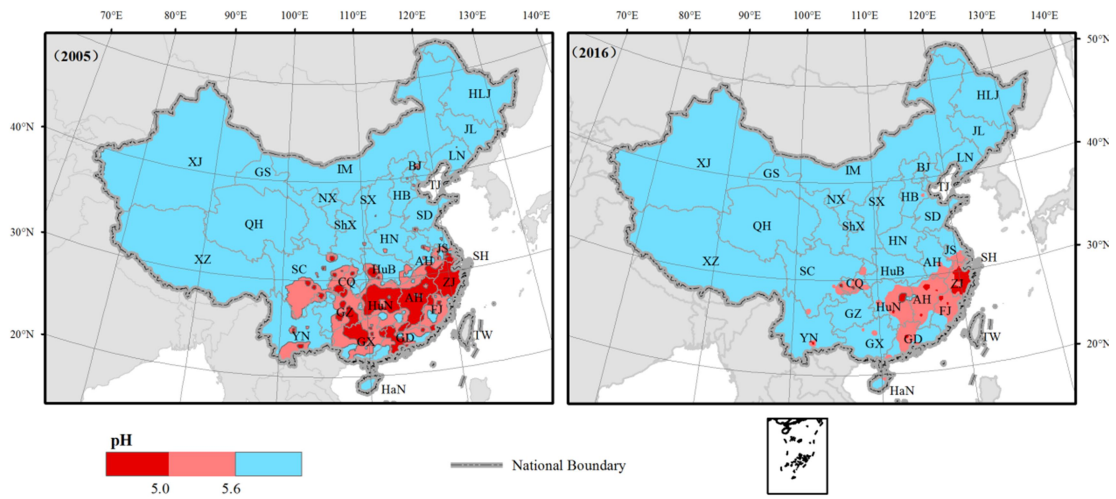

**Fig. S2** Spatial distribution of precipitation pH in 2005 and 2016 (China Environmental Bulletin 2005 and 2016)
